# Supplementary material
Source: Springer Nature journal article supplement (https://www.springermedizin.de/resource/supplementary/12876_2014_1181_MOESM3_ESM.pdf/9438280)

**A**

Relative mRNA expression levels of CD24

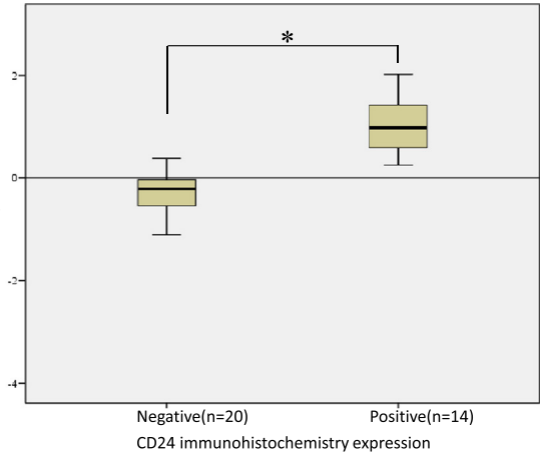**B**

Relative mRNA expression levels of CD44

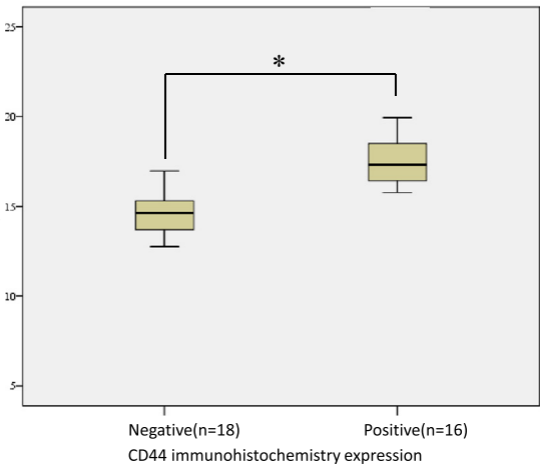

Supplement: MOESM3 [file 9438280]
